# Supplementary material for: A Mighty Claw: Pinching Force of the Coconut Crab, the Largest Terrestrial Crustacean
Source: PubMed Central journal article supplement (PMC5120803; doi:10.1371/journal.pone.0166108), 2016-11-23
Supplement: pone.0166108.s001.pdf [file pone.0166108.s001.pdf]

S1 Table. Pinching force of the crabs including in this study, for the pinching force measurements.

| ThL (mm) | BW (g) | Sex | CL(mm) | CH(mm) | CW(mm) | Pinching force(kgf) |
|----------|--------|-----|--------|--------|--------|---------------------|
| 16.2     | 33     | F   | 23.7   | 15.9   | 9.8    | 3.0                 |
| 24.8     | 110    | F   | 33.7   | 20.7   | 14.2   | 10.8                |
| 28.0     | 150    | M   | 40.0   | 24.6   | 16.5   | 23.8                |
| 28.5     | 150    | F   | 41.9   | 26.4   | 16.8   | 18.0                |
| 28.5     | 160    | M   | 42.1   | 27.6   | 16.8   | 21.8                |
| 25.8     | 180    | M   | 40.4   | 26.4   | 16.3   | 19.6                |
| 30.5     | 194    | F   | 42.9   | 26.6   | 16.8   | 31.2                |
| 32.5     | 250    | M   | 48.9   | 29.0   | 18.5   | 30.3                |
| 34.0     | 290    | F   | –      | –      | –      | 24.9                |
| 35.7     | 320    | F   | –      | –      | –      | 25.2                |
| 35.8     | 350    | M   | 53.8   | 34.6   | 22.4   | 38.8                |
| 37.4     | 380    | F   | 54.2   | 33.4   | 21.4   | 34.4                |
| 36.9     | 400    | F   | 55.4   | 34.9   | 22.9   | 36.2                |
| 35.2     | 450    | F   | 55.2   | 37.0   | 24.3   | 43.8                |
| 42.1     | 614    | F   | –      | –      | –      | 34.6                |
| 41.0     | 642    | F   | 69.2   | 44.1   | 26.0   | 59.3                |
| 40.0     | 670    | M   | 67.2   | 42.8   | 25.3   | 47.0                |
| 45.1     | 700    | M   | –      | –      | –      | 48.8                |
| 48.6     | 760    | M   | 79.3   | 47.5   | 29.9   | 65.7                |
| 51.8     | 980    | M   | –      | –      | –      | 66.9                |
| 47.5     | 1000   | M   | 76.4   | 51.9   | 31.5   | 85.6                |
| 49.8     | 1140   | M   | –      | –      | –      | 52.7                |
| 52.5     | 1440   | M   | 90.6   | 55.1   | 35.6   | 95.0                |
| 62.1     | 1580   | M   | 103.5  | 58.4   | 40.3   | 144.0               |
| 64.5     | 1770   | M   | 98.5   | 59.1   | 38.4   | 134.5               |
| 62.5     | 1920   | M   | 104.4  | 60.2   | 40.7   | 120.3               |
| 61.7     | 2070   | M   | 107.7  | 64.9   | 40.8   | 180.0               |
| 63.3     | 2090   | M   | 109.1  | 65.9   | 45.2   | 161.0               |
| 63.9     | 2120   | M   | 106.0  | 65.1   | 43.0   | 134.5               |
