# Supplementary material for: A Mighty Claw: Pinching Force of the Coconut Crab, the Largest Terrestrial Crustacean
Source: PubMed Central journal article supplement (PMC5120803; doi:10.1371/journal.pone.0166108), 2016-11-23
Supplement: pone.0166108.s002.pdf [file pone.0166108.s002.pdf]

S2 Table. Sarcomere length measurements.

| sarcomere length ( $\mu\text{m}$ ) |      |    |       |
|------------------------------------|------|----|-------|
| 1                                  | 8.06 | 36 | 6.41  |
| 2                                  | 8.37 | 37 | 6.41  |
| 3                                  | 7.43 | 38 | 6.55  |
| 4                                  | 7.29 | 39 | 10.00 |
| 5                                  | 7.22 | 40 | 8.46  |
| 6                                  | 7.26 | 41 | 9.84  |
| 7                                  | 6.71 | 42 | 9.97  |
| 8                                  | 6.66 | 43 | 9.71  |
| 9                                  | 9.47 | 44 | 10.08 |
| 10                                 | 9.14 | 45 | 10.53 |
| 11                                 | 7.68 | 46 | 11.44 |
| 12                                 | 7.76 | 47 | 9.19  |
| 13                                 | 7.96 | 48 | 9.76  |
| 14                                 | 7.56 | 49 | 7.17  |
| 15                                 | 6.75 | 50 | 8.21  |
| 16                                 | 7.19 | 51 | 9.21  |
| 17                                 | 9.39 | 52 | 8.74  |
| 18                                 | 7.80 | 53 | 11.00 |
| 19                                 | 8.19 | 54 | 8.19  |
| 20                                 | 7.39 | 55 | 7.40  |
| 21                                 | 7.07 | 56 | 8.06  |
| 22                                 | 6.32 | 57 | 6.23  |
| 23                                 | 6.83 | 58 | 7.53  |
| 24                                 | 5.56 | 59 | 9.29  |
| 25                                 | 6.01 | 60 | 7.03  |
| 26                                 | 5.68 | 61 | 8.52  |
| 27                                 | 5.68 | 62 | 9.16  |
| 28                                 | 7.48 | 63 | 8.62  |
| 29                                 | 6.87 | 64 | 9.81  |
| 30                                 | 7.49 | 65 | 8.53  |
| 31                                 | 5.96 | 66 | 9.52  |
| 32                                 | 5.47 | 67 | 9.97  |
| 33                                 | 5.37 | 68 | 9.50  |
| 34                                 | 6.60 | 69 | 10.24 |
| 35                                 | 7.43 | 70 | 10.13 |
